# Supplementary material
Source: Springer Nature journal article supplement (https://www.springermedizin.de/resource/supplementary/12885_2005_477_MOESM2_ESM.pdf/9469560)

Time to progression

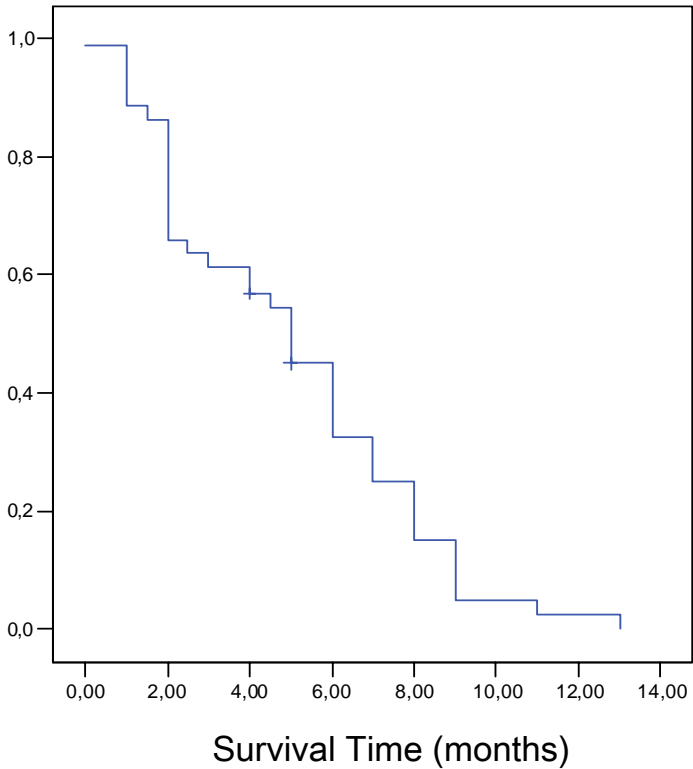

Median TTP (95% C.I.): 5,00 (3,75 - 6,25 )

Supplement: MOESM2 [file 9469560]
